# Supplementary material
Source: PubMed Central journal article supplement (PMC7182079)
Supplement: NIHMS1570858-supplement-2.pdf [file NIHMS1570858-supplement-2.pdf]

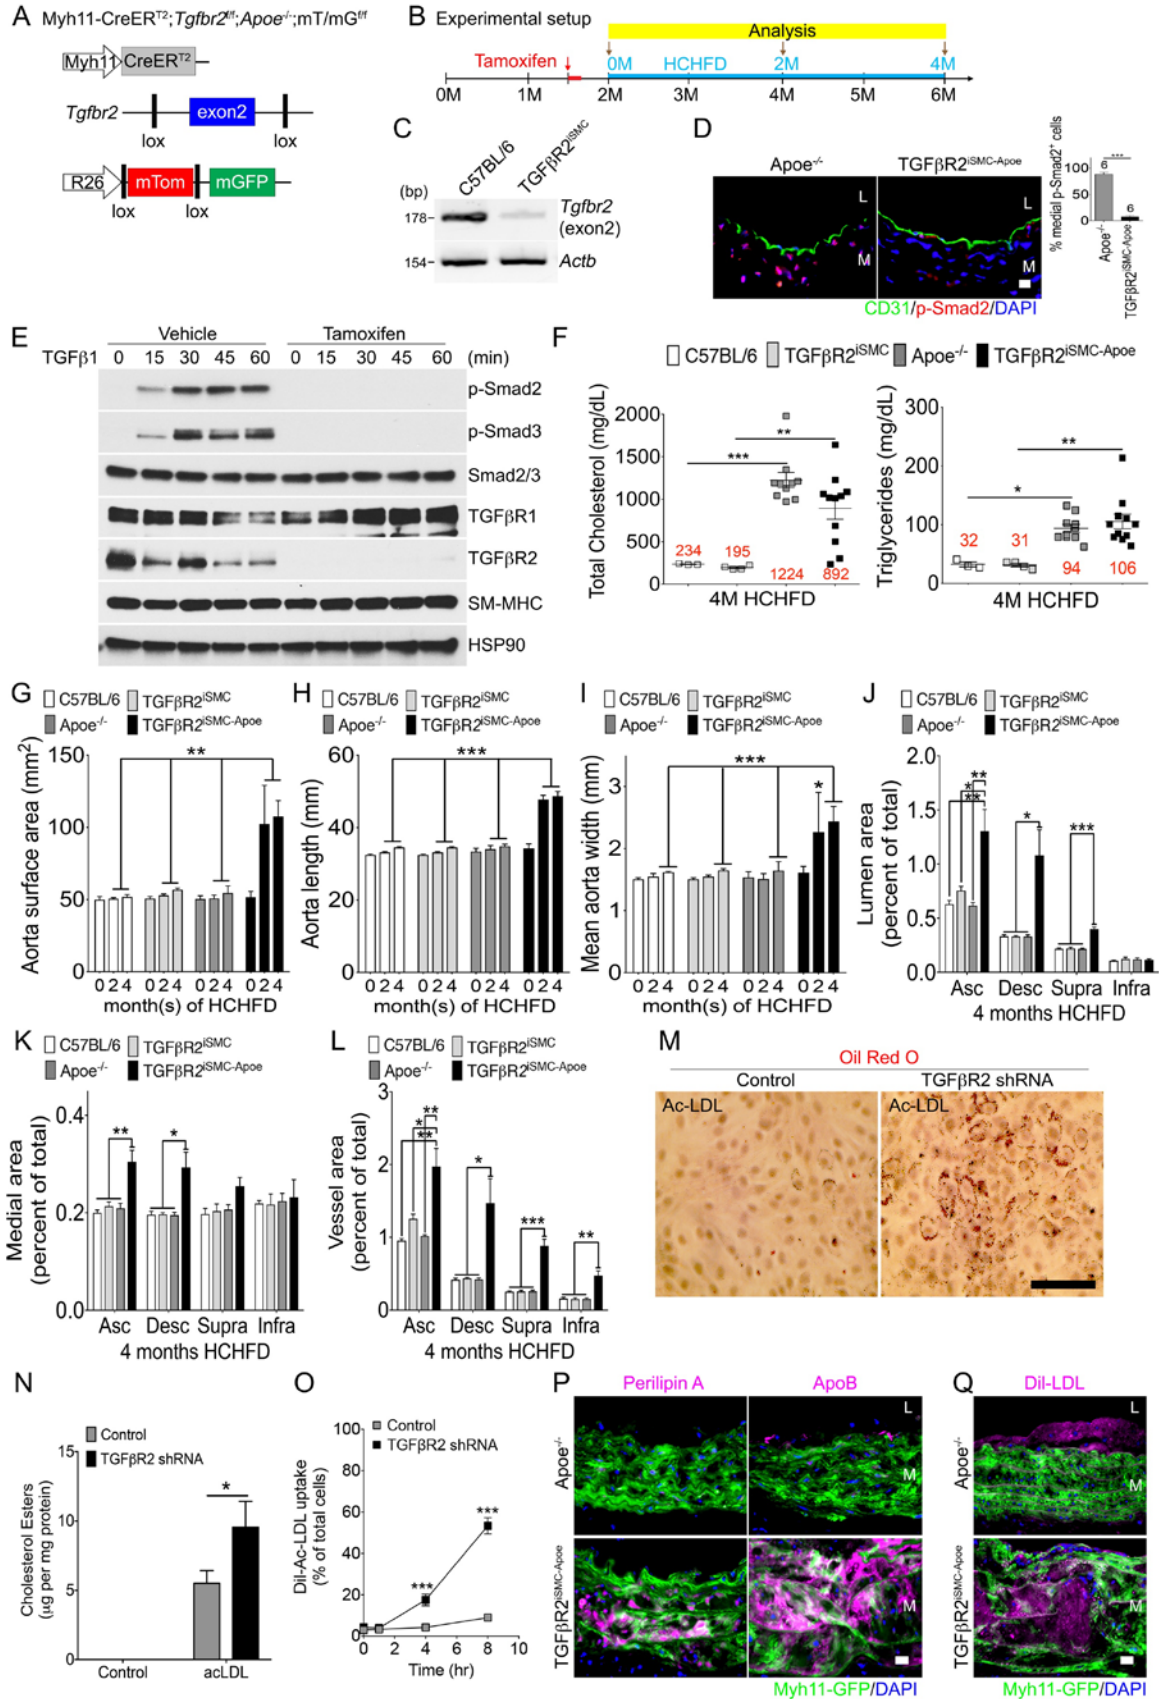

**Supplementary Figure 1. Related to Figure 2. Generation and characterization of *Apoe*<sup>-/-</sup> mice with smooth muscle cell-specific *Tgfbr2* ablation.**

(A) Scheme of the Myh11-CreER<sup>T2</sup> transgene, *Tgfbr2* floxed alleles, and R26-mTmG reporter constructs. (B) Scheme of Tamoxifen injection (1 mg/day i.p. for 5 days starting at 6 weeks old) and high cholesterol high fat diet (HCHFD) feeding. (C) PCR for *Tgfbr2* exon 2 mRNA expression using medial layers of mouse ascending aorta without adventitia. (D) Representative images of p-Smad2 immunofluorescence staining of *Apoe*<sup>-/-</sup> and TGFβR2<sup>iSMC-Apoe</sup> aorta. Endothelial cells are visualized by CD31 (green). L: lumen. M: Media. Nuclei were stained with DAPI (blue). N= 6 mice/group. Scale bar: 10 μm. (E) Aortic smooth muscle cells were isolated from vehicles or tamoxifen treated mice and were treated with TGFβ1 (0.5 ng/ml) for the indicated times and downstream signaling was analyzed by immunoblotting. Blots are representative of 3 independent experiments. (F) Total cholesterol and triglycerides levels from C57BL/6, TGFβR2<sup>iSMC</sup>, *Apoe*<sup>-/-</sup>, and TGFβR2<sup>iSMC-Apoe</sup> mice after 4 months on a HCHFD (\*p<0.05; \*\*p<0.01; \*\*\*p<0.001; unpaired two-tailed Student's t test). N=3 for C57BL/6 mice; N=4 for TGFβR2<sup>iSMC</sup> mice; N=10 for *Apoe*<sup>-/-</sup> mice; and N=11 for TGFβR2<sup>iSMC-Apoe</sup> mice. (G-I) Aorta surface area, aorta length, and width in C57BL/6, TGFβR2<sup>iSMC</sup>, *Apoe*<sup>-/-</sup>, and TGFβR2<sup>iSMC-Apoe</sup> mice after 0, 2, 4 months on a high cholesterol high fat diet (HCHFD). All data shown as mean ± SEM (\*p<0.05; \*\*\*p<0.01; \*\*\*\*p<0.001; unpaired two-tailed Student's t test) (for each time point N=3 for C57BL/6 mice; N=3 for TGFβR2<sup>iSMC</sup> mice; N=11 for *Apoe*<sup>-/-</sup> mice; and N=11 for TGFβR2<sup>iSMC-Apoe</sup> mice). (J-L) Lumen, media, and vessel areas of ascending (Asc), descending (Desc), suprarenal (Supra), and infrarenal (Infra) aortas in 24-week-old mice after 4 months of HCHFD. All data shown as mean ± SEM (\*p<0.05; \*\*\*p<0.01; \*\*\*\*p<0.001; unpaired two-tailed Student's t test) (N=3 for C57BL/6 mice; N=3 for TGFβR2<sup>iSMC</sup> mice; N=11 for *Apoe*<sup>-/-</sup> mice; and N=11 for TGFβR2<sup>iSMC-Apoe</sup> mice). (M) Representative pictures from control and TGFβR2 knockdown HASMCs incubated with Ac-LDL (100 μg/ml) for 72 hrs and stained with Oil Red O. Nuclei were counterstained with haematoxylin. Images are representative of three independent experiments. Scale bar: 100 μm. (N) Control and TGFβR2 knockdown HASMCs were incubated with or without Ac-LDL (100 μg/ml) for 72 hrs. Quantification of cholesterol esters in control and TGFβR2 knockdown HASMCs. Data represent the mean ± SEM and are representative of three experiments in duplicate. (\*p<0.05; unpaired two-tailed Student's t test). (O) Cells were treated with control and TGFβR2 shRNA for 4 days and incubated with DiI-Ac-LDL (100 μg/ml) in low LDL media (LPDS) for 0, 1, 4, 8 hrs at 37°C. At the end of labeling period, cells were rinsed with probe-free media and analyzed by FACS. Data represent the mean ± SEM and are representative of three experiments in duplicate. (\*\*\*p<0.001; unpaired two-tailed Student's t test). (P) Immunohistochemical staining of Perilipin A (lipid droplet) and ApoB (major very-low-density lipoprotein component) in the ascending aortas of *Apoe*<sup>-/-</sup> and TGFβR2<sup>iSMC-Apoe</sup> mice after 1 month of high cholesterol high fat diet (N=3 mice/group). L: lumen. M: Media. Nuclei were counterstained with DAPI (blue). Scale bar: 16 μm. (Q) Cross-section images of ascending aorta from *Apoe*<sup>-/-</sup> and TGFβR2<sup>iSMC-Apoe</sup> mice 18 hrs after intravenous injection with DiI-LDL (300 μg). Immunofluorescence analysis of DiI-LDL infiltration (N=3 mice/group). I: Intima. L: lumen. M: Media. Nuclei were counterstained with DAPI (blue). Scale bar: 16 μm.

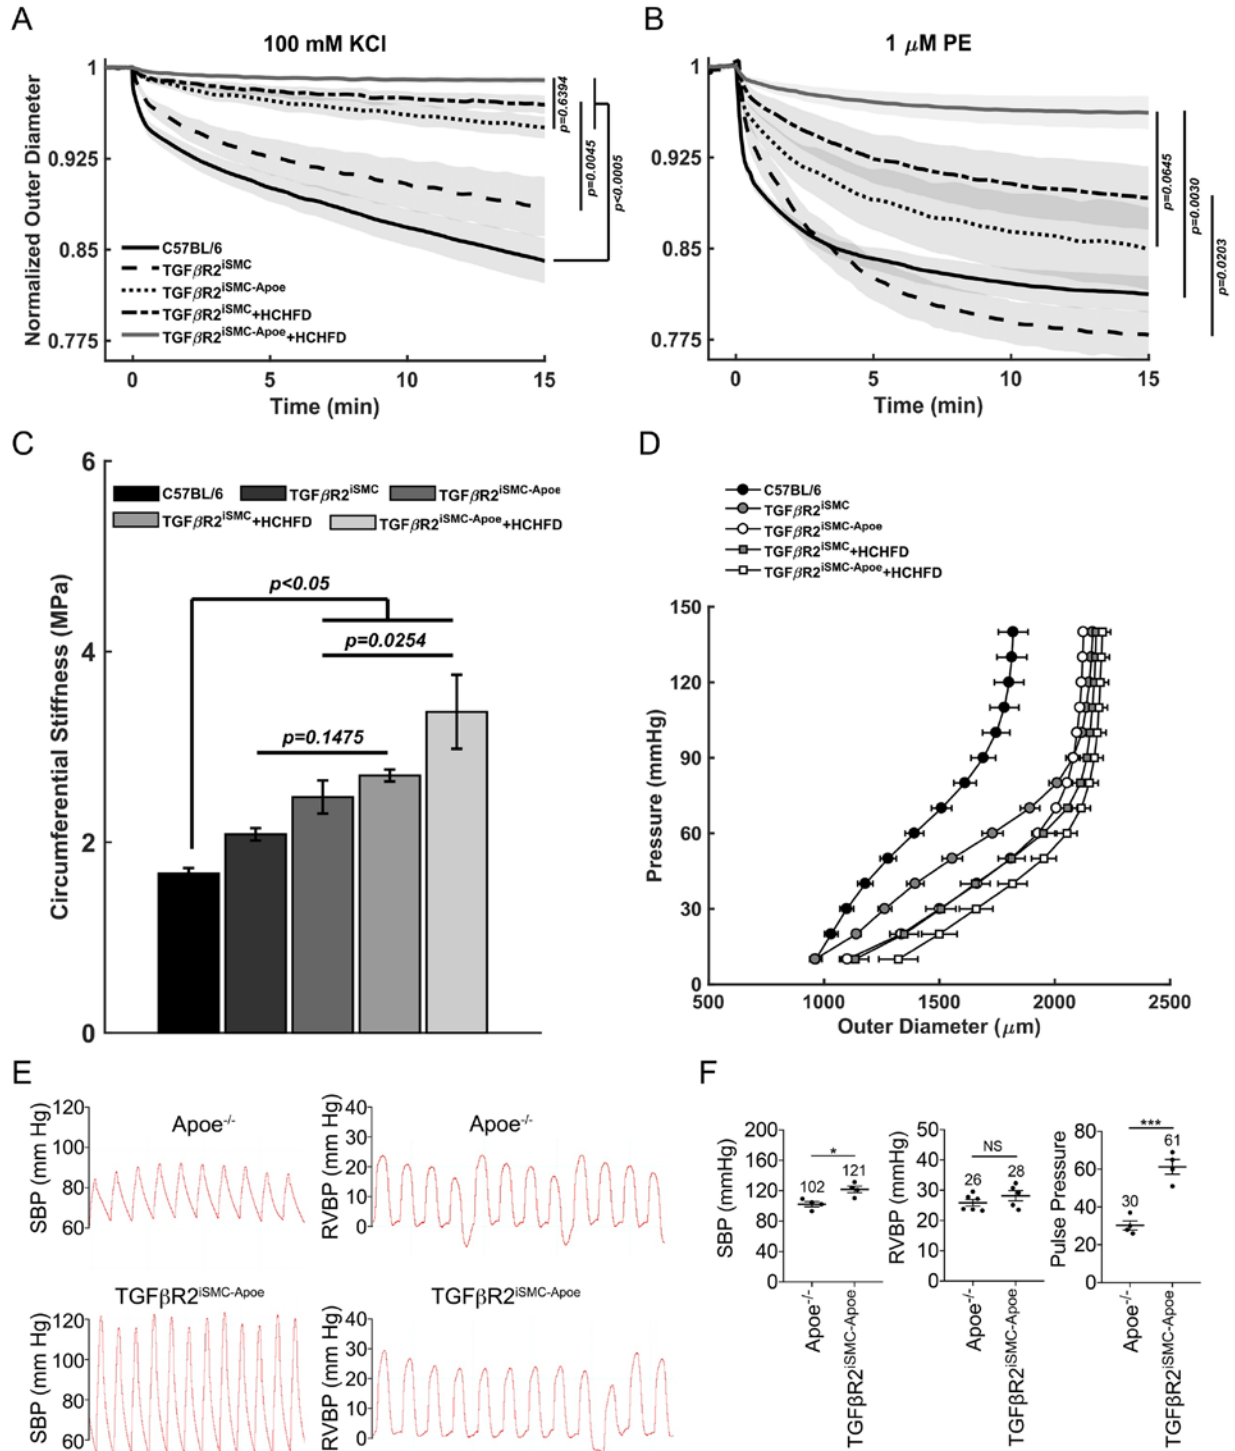

**Supplementary Figure 2. Related to Figure 2. Active, passive biomechanical analysis, and blood pressure measurement of C57BL/6, TGF $\beta$ R2<sup>ISMIC</sup>, Apoe<sup>-/-</sup>, and TGF $\beta$ R2<sup>ISMIC</sup>-Apoe<sup>-/-</sup> mice ascending aortas.**

(A,B) Time-course of changes in outer diameter of the ascending aorta following *ex vivo* exposure to (A) potassium chloride (KCl) or (B) phenylephrine (PE), with diameter normalized to the group-specific value prior to agonist exposure (time < 0 min). Transmural pressure was maintained at 90 mmHg and axial stretch at group-specific *in vivo* values  $\lambda_2^{iv}$ . Lines denote group means and shaded regions denote  $\pm$  SEM. Between-group *p* values are shown for C57BL/6 vs. all mutant groups as well as for mutants on normal vs. high cholesterol high fat diet (HCHF).

Contractile response to PE is significantly impaired in the  $TGF\beta R2^{iSMC}$  group with a HCHFD compared to those on a normal diet. Though change in normalized diameter was not different between  $TGF\beta R2^{iSMC-ApoE}$  on a normal diet and HCHFD, differences manifested when comparing contractile induced reductions in circumferential wall stress ( $p = 0.0291$ ). N=5 for C57BL/6 mice; N=5 for  $TGF\beta R2^{iSMC}$  mice; N=4 for  $TGF\beta R2^{iSMC-ApoE}$  mice; N=5 for  $TGF\beta R2^{iSMC}$  mice fed with HCHFD; and N=4 for  $TGF\beta R2^{iSMC-ApoE}$  mice fed with HCHFD. (C) Circumferential material stiffness increases with lipid challenge in the  $TGF\beta R2^{iSMC-ApoE}$  group alone. Data are represented as mean  $\pm$  SEM. Significance was considered when  $p < 0.05$ . N=5 for C57BL/6 mice; N=5 for  $TGF\beta R2^{iSMC}$  mice; N=4 for  $TGF\beta R2^{iSMC-ApoE}$  mice; N=5 for  $TGF\beta R2^{iSMC}$  mice fed with HCHFD; and N=4 for  $TGF\beta R2^{iSMC-ApoE}$  mice fed with HCHFD. (D) Pressure-diameter data from fixed-length cyclic pressurization testing at  $\lambda_z^{iv}$ . The pressure-diameter behavior of the  $TGF\beta R2^{iSMC-ApoE} + HCHFD$  group (white squares) loses the characteristic “S”-shape, suggesting that the elastic fibers contribute less. N=5 for C57BL/6 mice; N=5 for  $TGF\beta R2^{iSMC}$  mice; N=4 for  $TGF\beta R2^{iSMC-ApoE}$  mice; N=5 for  $TGF\beta R2^{iSMC}$  mice fed with HCHFD; and N=4 for  $TGF\beta R2^{iSMC-ApoE}$  mice fed with HCHFD. (E) Representative record of SBP and RVBP in  $ApoE^{-/-}$  and  $TGF\beta R2^{iSMC-ApoE}$  mice after 4 months of HCHFD. N=4 mice/group. (F) Summarized data (mean  $\pm$  SEM) showing the peak value of SBP, RVBP and pulse pressure.

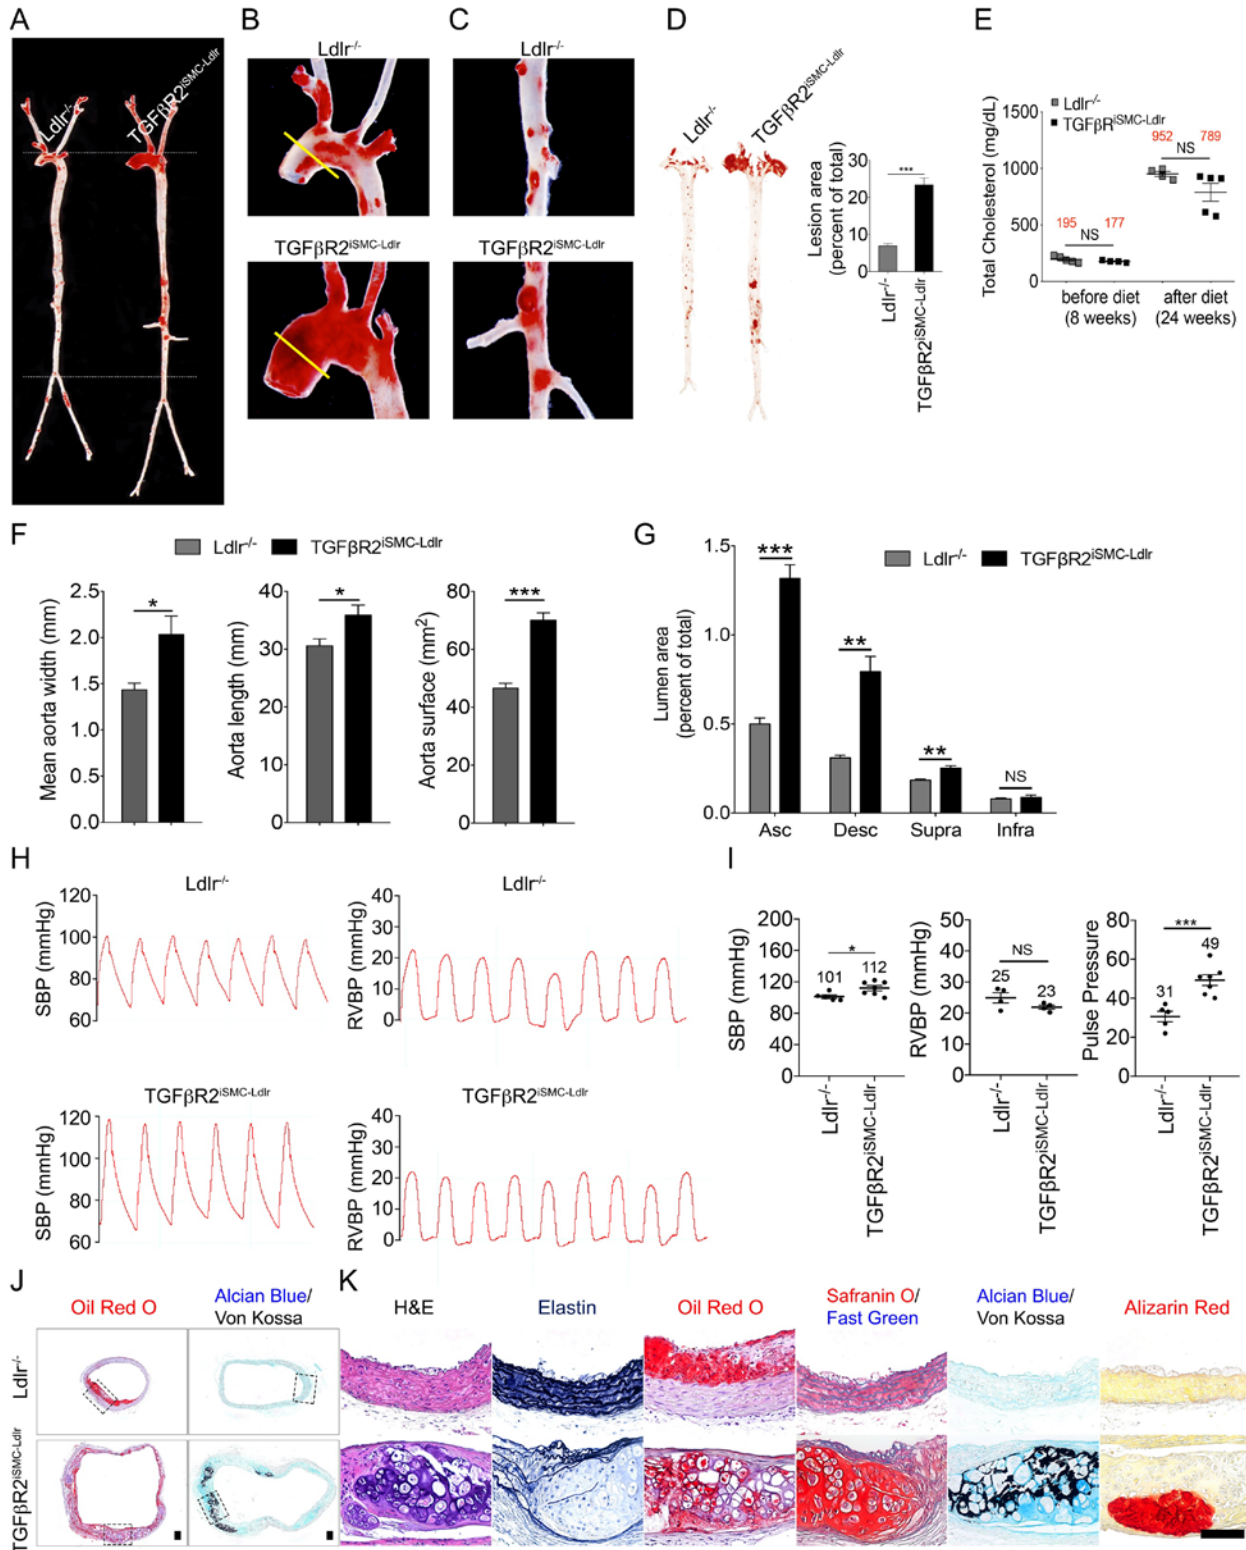

**Supplementary Figure 3. Related to Figure 2 and Figure 3. Smooth muscle cell *Tgfr2* knockout in *Ldlr*<sup>-/-</sup> background accelerates aneurysm formation and atherosclerosis plaque development.**

(A-C) Representative photomicrographs of Oil-Red-O stained whole aorta (A), aortic arch (B) or abdominal aorta (C) of *Ldlr*<sup>-/-</sup> and *TGFβR2*<sup>iSMC-Ldlr</sup> mice after 4 months of high cholesterol high fat diet (HCHFD). N=3 mice/group. (D) (left) Microphotographs of en face aortas from *Ldlr*<sup>-/-</sup> and *TGFβR2*<sup>iSMC-Ldlr</sup> mice after 4 months of HCHFD

stained with Oil-Red-O. (right) Lesion area quantification: % lesion area refers to Oil-Red-O stained as a % of the total aortic surface. All data shown as mean  $\pm$  SEM ( $\emptyset$ : not detected; \*\*\* $p < 0.001$ ; unpaired two-tailed Student's t test) (N=10 mice/group). (E) Total cholesterol levels from *Ldlr*<sup>-/-</sup> and TGF $\beta$ 2<sup>iSMC-Ldlr</sup> mice after 4 months on a HCHFD (NS: not significant; unpaired two-tailed Student's t test). N=4 mice/group. (F) Aorta surface area, aorta length, and width in *Ldlr*<sup>-/-</sup> and TGF $\beta$ 2<sup>iSMC-Ldlr</sup> mice after 4 months on a high cholesterol high fat diet (HCHFD). All data shown as mean  $\pm$  SEM (\* $p < 0.05$ ; \*\*\* $p < 0.001$ ; unpaired two-tailed Student's t test) (N=10 mice/group). (G) Lumen areas of ascending (Asc), descending (Desc), suprarenal (Supra), and infrarenal (Infra) aortas in 24-week-old mice after 4 months of HCHFD. All data shown as mean  $\pm$  SEM (NS: not significant; \*\* $p < 0.01$ ; \*\*\* $p < 0.001$ ; unpaired two-tailed Student's t test) (N=10 mice/group). (H) Representative record of SBP and RVBP in *Ldlr*<sup>-/-</sup> and TGF $\beta$ 2<sup>iSMC-Ldlr</sup> mice. (I) Summarized data (mean  $\pm$  SEM) showing the peak value of SBP, RVBP and pulse pressure. For SBP and pulse pressure measurement N=5 for *Ldlr*<sup>-/-</sup> mice; and N=7 for TGF $\beta$ 2<sup>iSMC-Ldlr</sup> mice; for RVBP measurement N=4 mice/group. (J) Histologic analysis of mouse ascending aortas dissected from 24-week-old *Ldlr*<sup>-/-</sup> and TGF $\beta$ 2<sup>iSMC-Ldlr</sup> mice after 4 months of high cholesterol high fat diet (HCHFD). Representative low-magnification images of Oil-Red-O and Alcian Blue (cartilage)/Von Kossa (bone) stained mouse ascending aortas. N=6 mice/group. Scale bar: 200  $\mu$ m. (K) Representative images of H&E, Elastin, Oil-Red-O, Safranin O (cartilage)/Fast Green, Alcian Blue (cartilage)/Von Kossa (bone), and Alizarin Red (calcium)-stained mouse ascending aortas from *Ldlr*<sup>-/-</sup> and TGF $\beta$ 2<sup>iSMC-Ldlr</sup> mice (N=6 mice/group). Scale bar: 50  $\mu$ m.



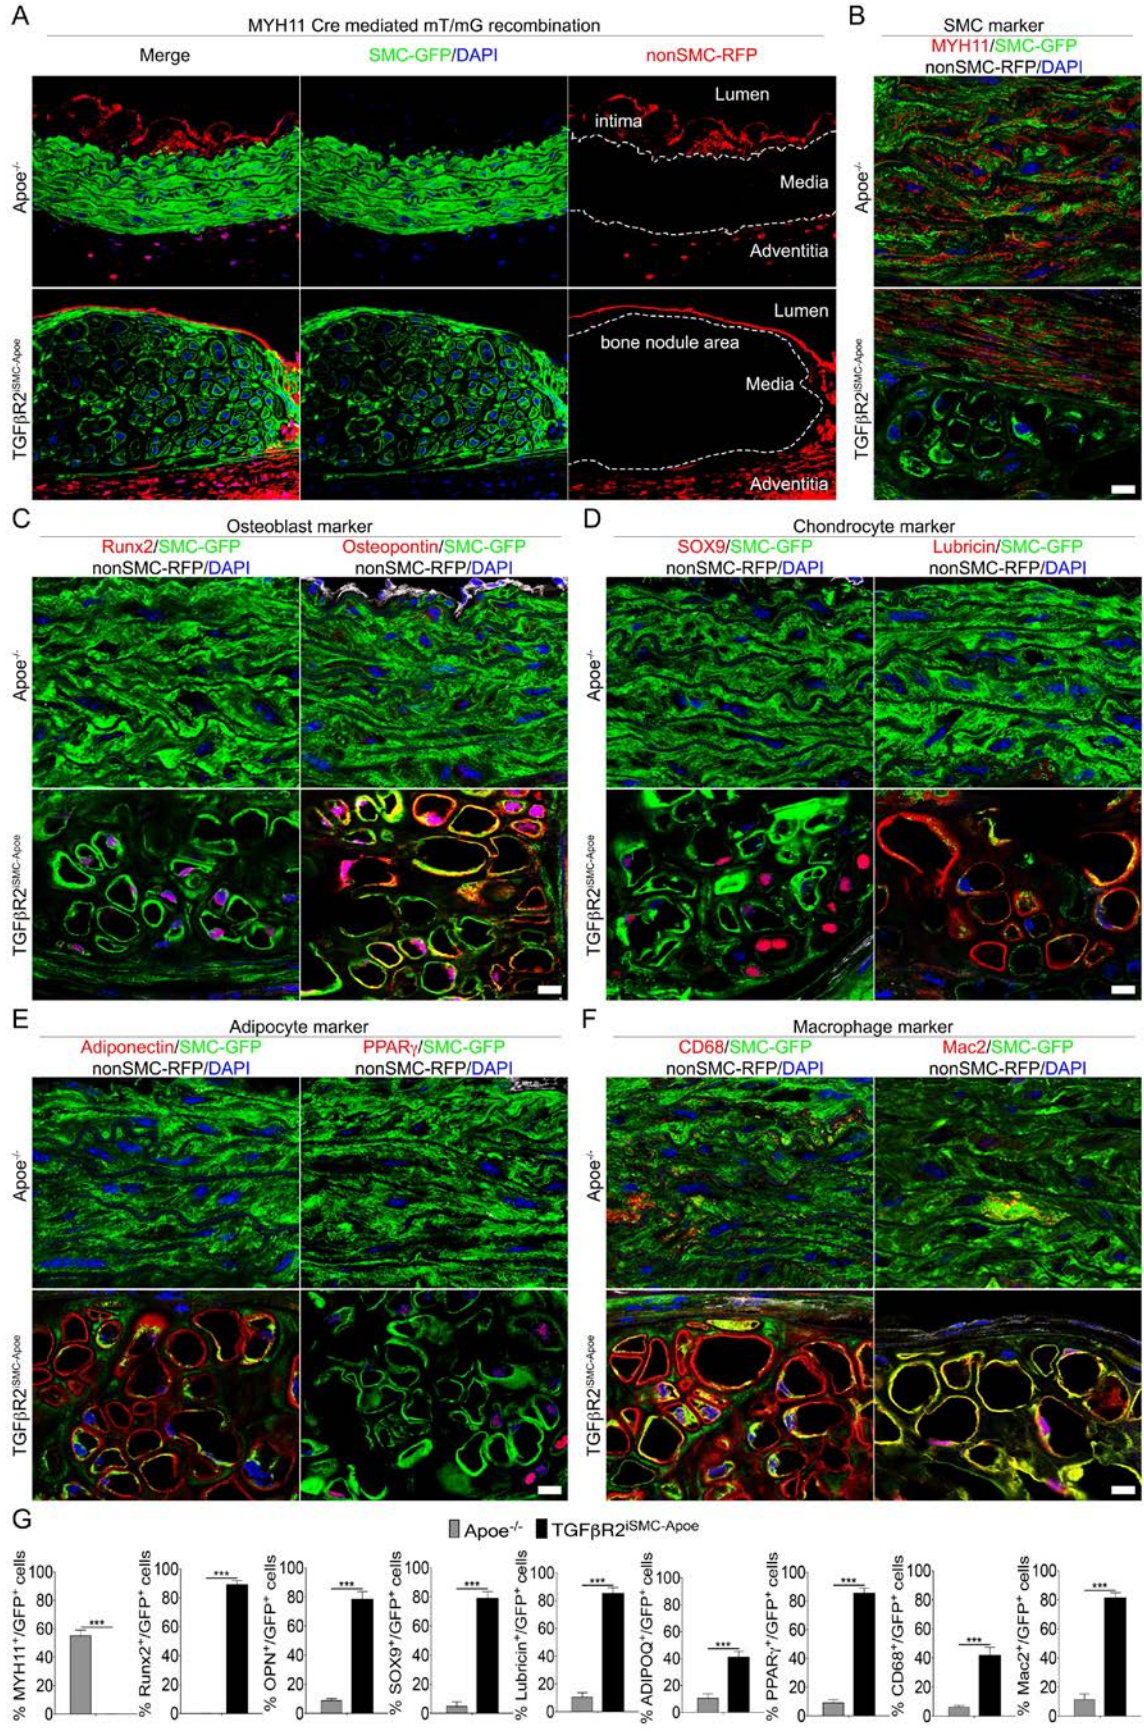

**Supplementary Figure 4. Related to Figure 3 and Figure 4. SMCs express smooth muscle cell, chondrocyte, adipocyte, osteoblast, and macrophage lineage markers in  $TGF\beta R2^{iSMC-ApoE}$  mice after 4 months of high cholesterol high fat diet.**

(A) Z-stack confocal images of ascending aorta cross sections showing tamoxifen-dependent loss of RFP (red) and induction of GFP (green) expression by vessel wall cells selectively within the media, but not the neointima or adventitia, with DAPI-labeled nuclei (blue) in overlays (bar=10  $\mu$ m). Please note: only GFP<sup>+</sup> cell but not RFP<sup>+</sup> cells in the bone nodule area. N=4 mice/group. (B) Immunohistochemical staining of smooth muscle cell lineage-specific marker (MYH11) in the ascending aortas of *ApoE*<sup>-/-</sup> and  $TGF\beta R2^{iSMC-ApoE}$  mice after 4 months of high cholesterol high fat diet using SP8 confocal microscope. (C-F) Immunohistochemical staining of lineage-specific markers (Osteoblast, Chondrocyte, Adipocyte, and Macrophage) in the ascending aortas of *ApoE*<sup>-/-</sup> and  $TGF\beta R2^{iSMC-ApoE}$  mice after 4 months of high cholesterol high fat diet using SP8 confocal microscope (N=6 mice/group). Scale bar: 10  $\mu$ m. (G) Quantification of the number of ascending aortic media smooth muscle cells expressing GFP (MYH11<sup>+</sup>) and SMC, adipocyte, osteoblast, chondrocyte, and macrophage lineage markers (\*\*\*)p<0.001; unpaired two-tailed Student's t test). N=6 mice/group.



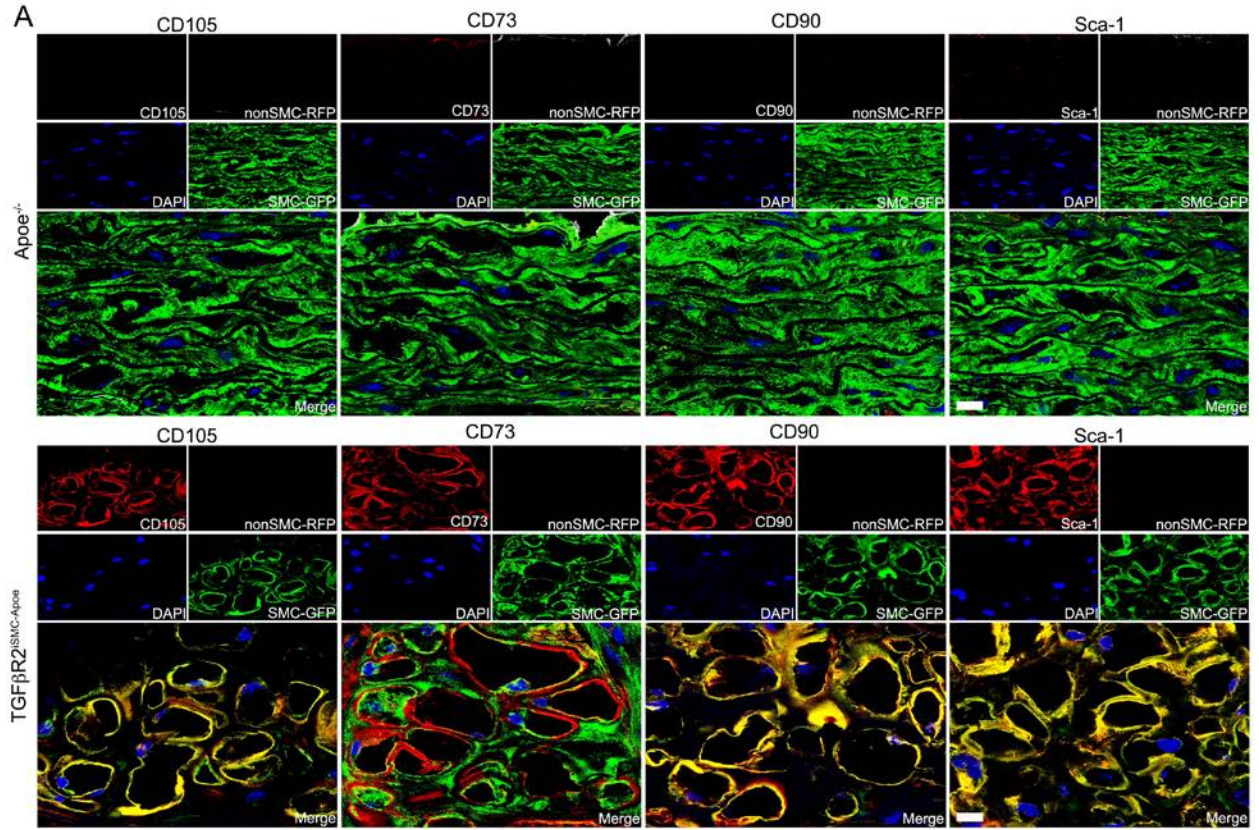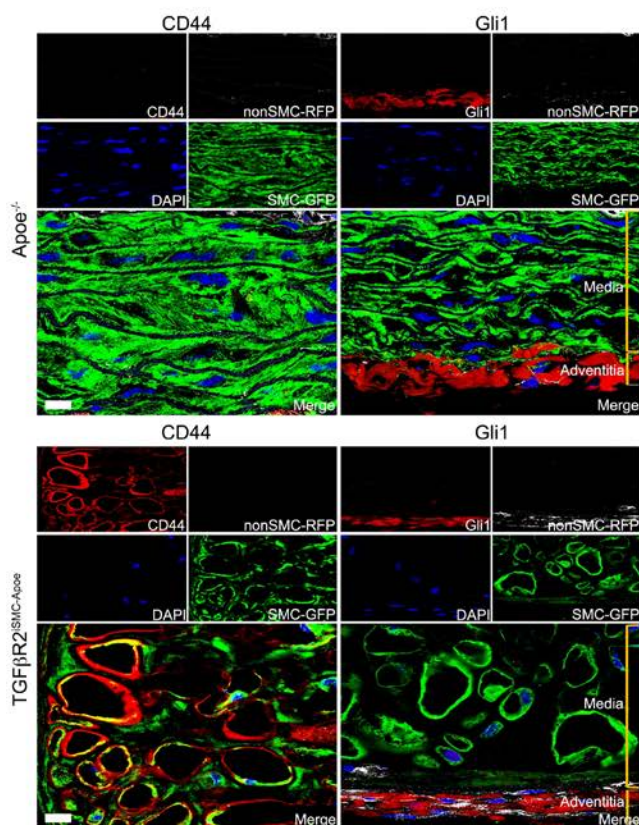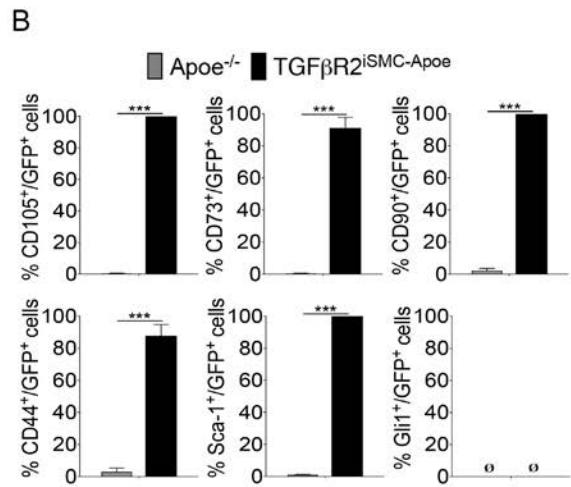

**Supplementary Figure 5. Related to Figure 4. Smooth muscle cells express stem cell markers in  $TGF\beta R2^{iSMC-ApoE}$  mice after 4 months of high cholesterol high fat diet,**

(A) Immunohistochemical staining of stem cell markers (CD105, CD73, CD90, Sca-1, CD44, Gli1) in the ascending aortas of  $ApoE^{-/-}$  and  $TGF\beta R2^{iSMC-ApoE}$  mice after 4 months of high cholesterol high fat diet using SP8 confocal microscope. N=6 mice/group. Scale bar: 10  $\mu$ m. (B) Quantification of the number of ascending aortic media smooth muscle cells expressing GFP (MYH11<sup>+</sup>) and stem cell markers ( $\emptyset$ : not detected; unpaired two-tailed Student's t test). See also Figure 4.

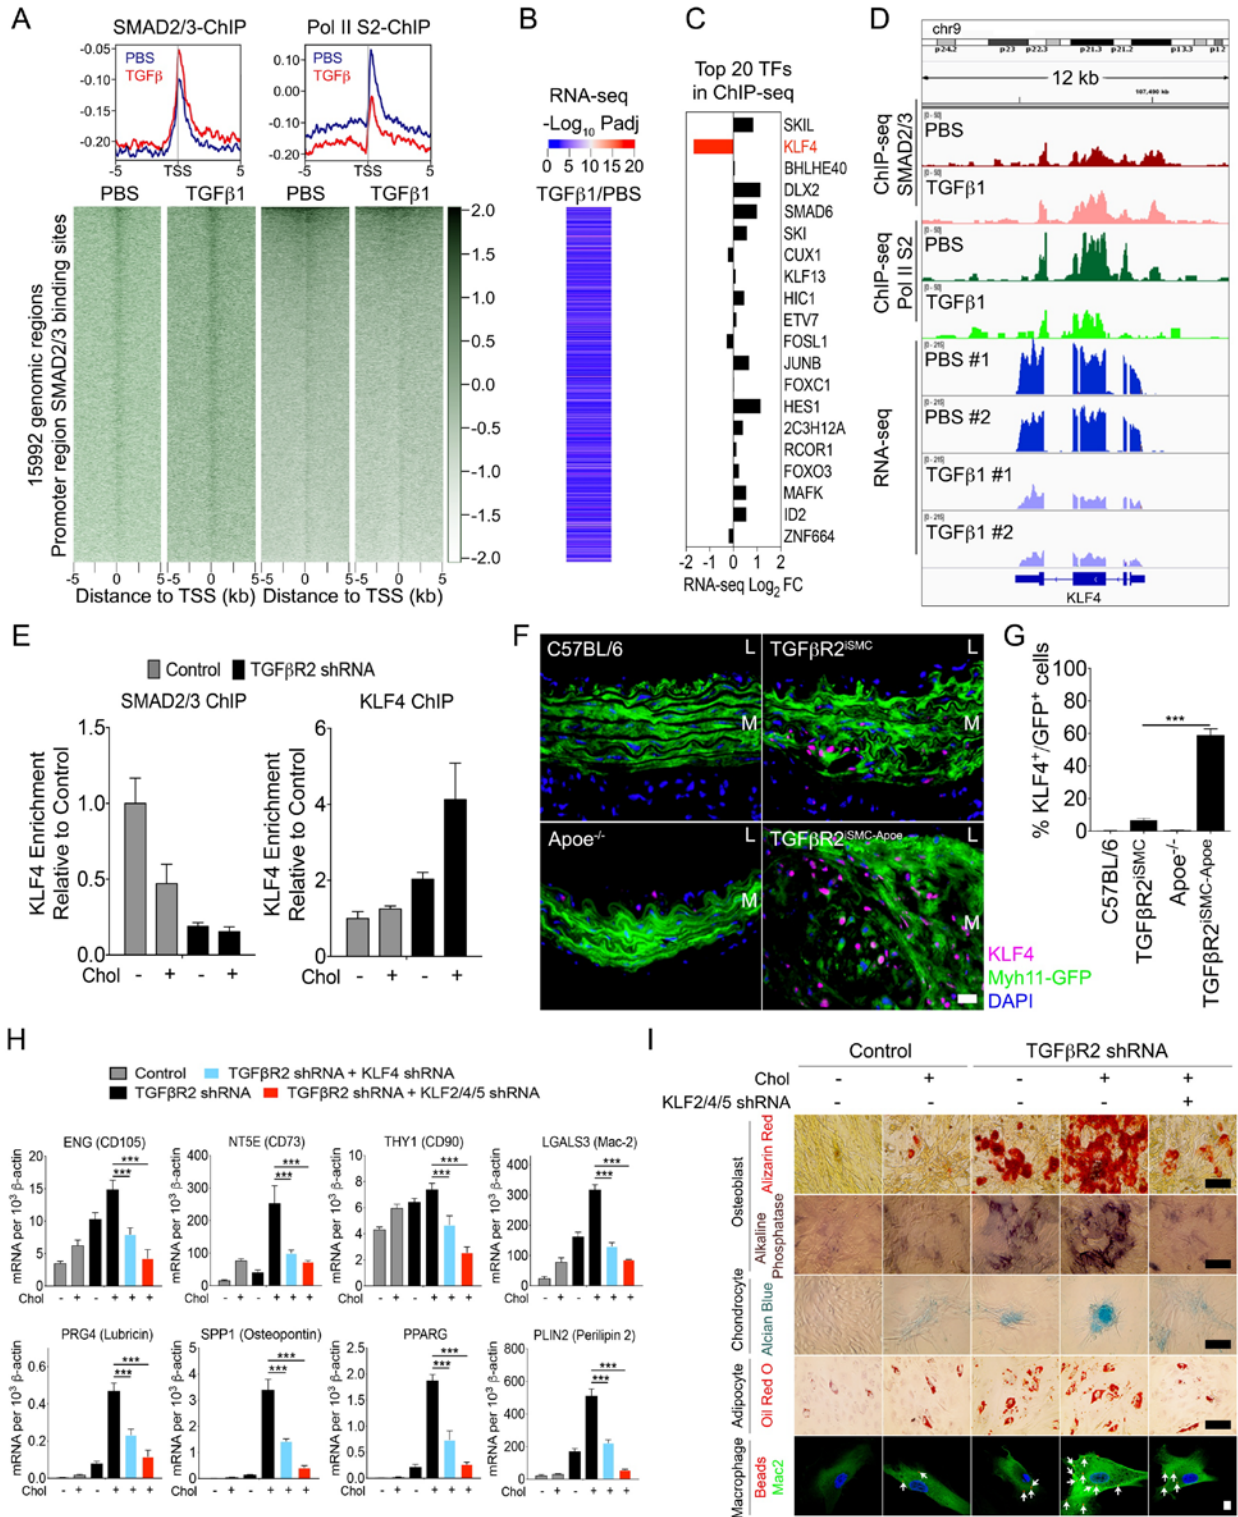

**Supplementary Figure 6. Related to Figure 7. KLF4 is the key regulator controlling TGF $\beta$  inhibition and Cholesterol responsive SMC transition.**

(A) Enrichment of genomic signals on 15,992 genes identified from running differential expression analysis for bulk RNA-Seq comparison of TGF $\beta$  treated vs. control groups. (Upper) Genome-wide occupancy of SMAD2/3 and Pol2-Ser2p at strong SMAD2/3 peaks in control (blue) and TGF $\beta$  treated (red) SMCs. The average signal within 5 kb genomic regions flanking the center of TSS is shown. (Lower) Heatmaps of SMAD2/3 ChIP-seq and Pol2-Ser2p

read counts for targets annotated TSS regions in the strong-binding group in control and TGF $\beta$  treated SMCs. Promoters are sorted in order of their SMAD2/3 intensity values. (B) Gene expression of upregulated and downregulated genes in response to TGF $\beta$  treatment. (C) Top 20 up and down-regulated differentially expressed transcription factors from ChIP-seq list. (D) Genomic coverage tracks depicting binding profile of SMAD2/3 and Pol2-Ser2p in KLF4 locus in control and TGF $\beta$  treated SMCs. RNA-seq analyses were also included with two biological repeats. Coverage tracks were normalized based on the number of reads. (E) Enrichment levels of SMAD2/3 and KLF4 by ChIP-qPCR at KLF4 locus in control and TGF $\beta$ R2 KD SMCs in the presence or absence of CD-cholesterol. Data represent mean  $\pm$  SEM of technical triplicates. Enrichment is shown as ChIP-to-input ratio normalized to the enrichment at the non-bound regions. (F) Histological analysis of KLF4 expression in mouse ascending aortas after 4 month of high cholesterol high fat diet. Nuclei were stained with DAPI (blue). Scale bar: 16  $\mu$ m. (G) Quantification of the number of ascending aortic media smooth muscle cells expressing GFP (green) and KLF4 (magenta) (\*\*\*) $p < 0.001$ ; unpaired two-tailed Student's t test). (N=6 for C57BL/6 mice; N=6 for TGF $\beta$ R2<sup>iSMC</sup> mice; N=8 for *ApoE*<sup>-/-</sup> mice; and N=8 for TGF $\beta$ R2<sup>iSMC-ApoE</sup> mice). (H) Expression of MSC markers (ENG, NT5E, THY1) and osteoblast (SPP1), chondrocyte (PRG4), adipocyte (PPARG, PLIN2) and macrophage (LGALS3) markers in control, TGF $\beta$ R2 KD, TGF $\beta$ R2/KLF4 KD, and TGF $\beta$ R2/KLF2/KLF4/KLF5 KD SMCs with or without CD-cholesterol. Data represent the mean  $\pm$  SEM and are representative of three experiments in duplicate. (I) Control, TGF $\beta$ R2 KD, and TGF $\beta$ R2/KLF2/KLF4/KLF5 KD SMCs with or without CD-cholesterol cells possess in vitro trilineage differentiation capacity toward osteoblast (Alizarin Red, Alkaline Phosphatase), chondrocyte (Alcian Blue), adipocyte (Oil Red O), and macrophage beads uptake activity. Scale bar: 100  $\mu$ m for trilineage differentiation images. Scale bar: 8  $\mu$ m for macrophage beads uptake images. Experiments were repeated three times.



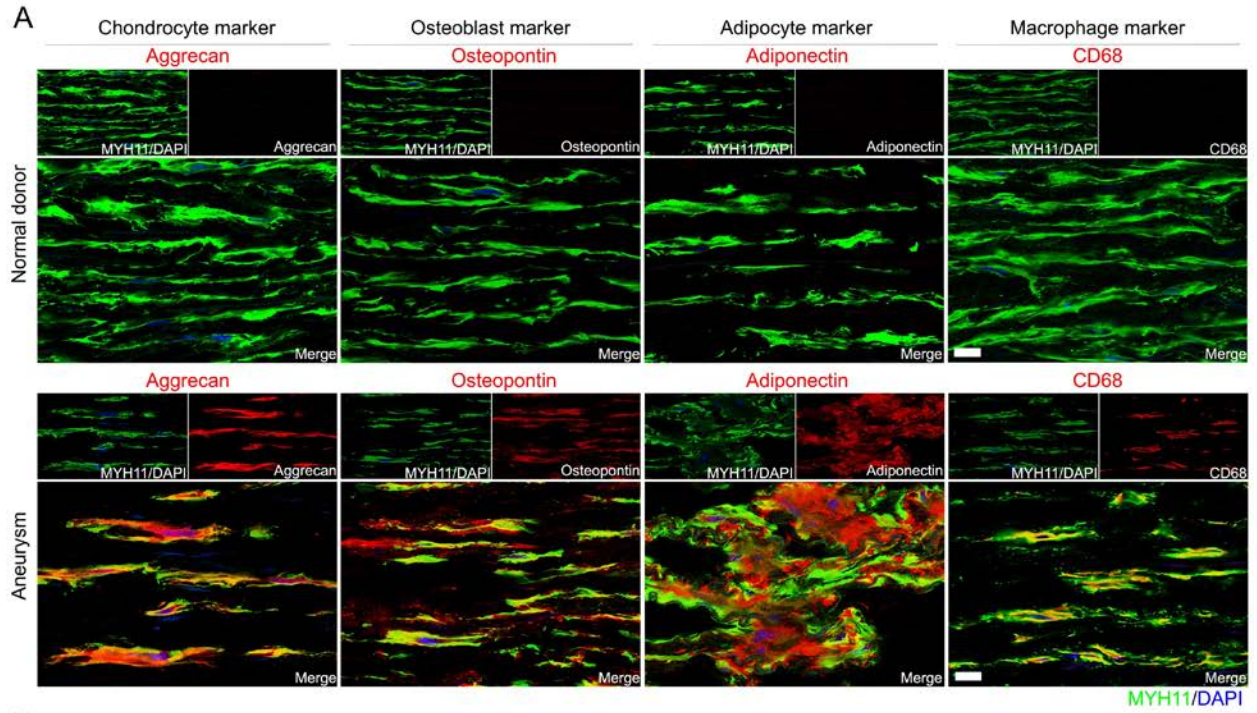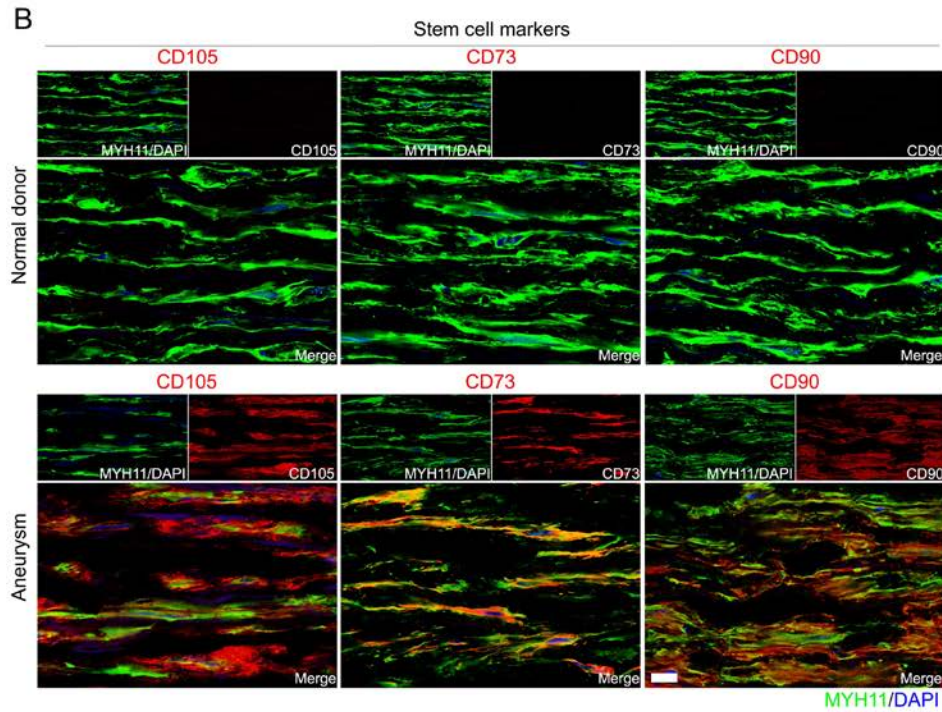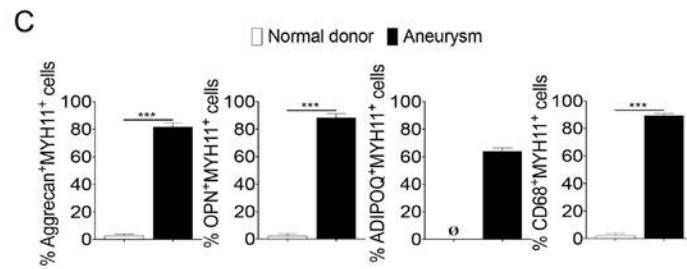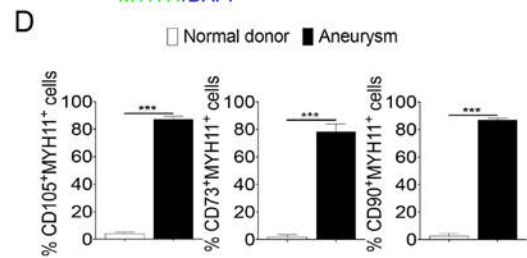



**Supplementary Figure 7. Related to Figure 1 and Figure 4. Smooth muscle cell express mesenchymal stem cell, bone, cartilage, and adipocyte lineage markers in older patients with aneurysm.**

(A-B) Histological analysis of human ascending aortas with lineage markers (Aggrecan, Osteopontin, Adiponectin, CD68) and stem cell markers (CD105, CD73, CD90) from normal donors (N=6) and aneurysm patients (N=6).

Nuclei were stained with DAPI (blue). Scale bar: 16  $\mu\text{m}$ . (C-D) Quantification of the number of ascending aortic media smooth muscle cells expressing MYH11 (green) and lineage and stem cell markers ( $\emptyset$ : not detected;

\*\*\* $p < 0.001$ ; unpaired two-tailed Student's t test). See also Figure 1 and Figure 4.

**Table S3. List of Primers used for qRT-PCR. Related to: Quantitative Reverse Transcription PCR” in the STAR Methods.**

| Gene Symbol         | QIAGEN Catalog Number                                        | RefSeq Accession       | Reference Positions | Band Size (bp)        |
|---------------------|--------------------------------------------------------------|------------------------|---------------------|-----------------------|
| ACTB                | PPH00073G                                                    | NM_001101              | 730                 | 174                   |
| Actb                | F: CCAGTTGGTAACAATGCCATGT<br>R: GGCTGTATTCCCCTCCATCG         |                        |                     |                       |
| ENG                 | PPH01140G                                                    | NM_000118              | 1381                | 116                   |
| KLF2                | PPH02566A                                                    | NM_016270              | 1128                | 164                   |
| KLF4                | PPH18388A                                                    | NM_004235              | 2002                | 151                   |
| KLF4 (specific)     | F: CTTATAACTTCCTTCGCTACAGCC<br>R: GCCGAGTTTGTGATTTAGCTG      |                        |                     |                       |
| KLF4 (non-specific) | F: ACAGAGTCTCCCTATATTGACCA<br>R: AGGTAGCTCACAACATAATGCCA     |                        |                     |                       |
| KLF5                | PPH00434A                                                    | NM_001730              | 996                 | 191                   |
| LGALS3              | PPH01754G                                                    | NM_002306              | 581                 | 62                    |
| NR1H3               | PPH01276C                                                    | NM_005693              | 1504                | 76                    |
| NT5E                | PPH12908E                                                    | NM_002526              | 3559                | 63                    |
| PLIN2               | PPH02583A                                                    | NM_001122              | 1213                | 142                   |
| PPARG               | PPH02291G                                                    | NM_015869              | 1287                | 93                    |
| PRG4                | PPH06096E                                                    | NM_005807              | 3453                | 131                   |
| SPP1                | PPH00582E                                                    | NM_000582              | 892                 | 88                    |
| Tgfr2 (exon2)       | F: GACCATCCATCCACTGAAACATTTTAAC<br>R: GACTTCATGCGGCTTCTCACAG |                        |                     |                       |
| THY1                | PPH02406G                                                    | NM_006288              | 1759                | 134                   |
|                     |                                                              | <u>TaqMan Assay ID</u> |                     | <b>Band Size (bp)</b> |
| Cd44                |                                                              | <u>Mm01277161_m1</u>   |                     | 63                    |
| Col2a1              |                                                              | <u>Mm01309565_m1</u>   |                     | 66                    |
| Eng                 |                                                              | <u>Mm00468252_m1</u>   |                     | 77                    |
| Klf2                |                                                              | <u>Mm00500486_g1</u>   |                     | 75                    |
| Klf4                |                                                              | <u>Mm00516104_m1</u>   |                     | 77                    |
| Klf5                |                                                              | <u>Mm00456521_m1</u>   |                     | 140                   |
| Lgals3              |                                                              | <u>Mm00802901_m1</u>   |                     | 108                   |
| Ly6a                |                                                              | <u>Mm00726565_s1</u>   |                     | 92                    |
| Myh11               |                                                              | <u>Mm00443013_m1</u>   |                     | 92                    |
| Nt5e                |                                                              | <u>Mm00501910_m1</u>   |                     | 77                    |
| Plin1               |                                                              | <u>Mm00558672_m1</u>   |                     | 89                    |
| Pparg               |                                                              | <u>Mm00440940_m1</u>   |                     | 63                    |
| Prg4                |                                                              | <u>Mm01284582_m1</u>   |                     | 63                    |
| Runx2               |                                                              | <u>Mm00501584_m1</u>   |                     | 91                    |
| Sox9                |                                                              | <u>Mm00448840_m1</u>   |                     | 101                   |
| Spp1                |                                                              | <u>Mm00436767_m1</u>   |                     | 114                   |
| Thy1                |                                                              | <u>Mm00493681_m1</u>   |                     | 68                    |
